# The Effect of the Manipulation of Follicle-Stimulating Hormone (FSH)-Peak Characteristics on Follicular Wave Dynamics in Sheep: Does an Ovarian-Independent Endogenous Rhythm in FSH Secretion Exist?<sup>1</sup>

R. Duggavathi, P.M. Bartlewski,<sup>3</sup> E. Agg, S. Flint, D.M.W. Barrett, and N.C. Rawlings<sup>2</sup>

Department of Veterinary Biomedical Sciences, Western College of Veterinary Medicine, University of Saskatchewan, Saskatoon, Saskatchewan, Canada S7N 5B4

## ABSTRACT

We designed three experiments to investigate the relationship between FSH peaks and ovarian follicular waves and to examine whether an endogenous rhythm of FSH peaks exists in sheep. In experiment 1, anestrus ewes were treated with ovine FSH (oFSH) or vehicle (6 ewes per group) at the expected time of an endogenous FSH peak, to double the FSH-peak amplitude in treated ewes. In experiment 2, anestrus ewes were treated with either oFSH or vehicle (6 ewes per group) at the expected time of two consecutive interpeak nadirs, such that the treated ewes had 5 FSH peaks in the time frame of 3 FSH peaks in control ewes. In experiment 3, to measure FSH concentrations, daily blood samples were collected from 5 cyclic ewes for a control period during the estrous cycle and then for three 17-day periods after ovariectomy. Daily blood samples were collected from another group of 8 ovariectomized ewes that were treated with estradiol-releasing implants and intravaginal progesterone sponges. Doubling the FSH-peak amplitude did not alter the characteristics of the following follicular wave. Increasing the frequency of FSH peaks stimulated the emergence of additional follicular waves, but did not alter the rhythmic occurrence of FSH peaks and follicular wave emergence. Endogenous follicular waves in oFSH-treated ewes emerged and grew in the presence of the growing largest follicle of the induced follicular waves. Finally, based on the observation of serum FSH concentrations in ovariectomized ewes, it appears that there exists an endogenous rhythm for peaks in daily serum FSH concentrations, which is, at least in part, independent of regulation by ovarian follicular growth patterns.

*endogenous rhythm, estradiol, follicle, follicle-stimulating hormone, FSH peaks, ovarian follicle, ovary, pituitary, sheep*

## INTRODUCTION

Ovarian antral follicular growth occurs in a wave-like pattern in sheep, both during the breeding season [1–8] and seasonal anestrus [9, 10]. The emergence of follicular waves is preceded by a transient peak in circulating FSH concentrations [2, 3, 6, 8–14]. However, the relationship between the characteristics of FSH peaks and the emer-

gence of follicular waves in ewes has not been studied [15]. Treatment of ewes with a superovulatory dose of FSH results in increased numbers of follicles growing to an ovulatory diameter [16–19]; however, the effects of changes in the amplitude of FSH peaks within a physiological range have not been tested. In a recent study from our laboratory [12], we demonstrated that the presence of the largest follicle of a wave induced by a treatment with ovine FSH (oFSH) did not postpone the occurrence of the next endogenous FSH peak. However, it is not known whether an increase in the frequency of FSH peaks, using repeated injections of FSH, would disrupt the rhythmic occurrence of endogenous FSH peaks and the regular emergence of follicular waves. As injection of oFSH induced a follicular wave that did not disrupt the normal rhythm of FSH peaks and follicular waves [12], a question arose as to the regulation of the peaks in FSH secretion that precede follicular waves. Could there be an ovarian-independent endogenous rhythm of FSH secretion (i.e., periodic peaks in serum FSH concentrations) in the ewe?

We designed a series of three experiments to examine the relationship between FSH peaks and follicular wave dynamics in nonprolific Western White Face ewes. Experiment 1 was intended to monitor the effect of a doubling of the FSH peak amplitude on the growth of antral follicles in the following follicular wave. Experiment 2 was designed to monitor the effect of increasing the frequency of peaks in FSH concentrations (peaks at an interval of 2 to 2.5 days compared with the normal interval of 4 to 5 days) on the rhythmic occurrence of endogenous FSH peaks and the emergence of follicular waves. The aim of experiment 3 was to determine whether periodic peaks in serum FSH concentrations were present in ovariectomized ewes, similar to those in ovary-intact ewes.

## MATERIALS AND METHODS

All experimental procedures were performed in accordance with the guidelines of the Canadian Council on Animal Care.

### Hormone Preparation

One milligram of the oFSH preparation (NIDDK-oFSH-18) used in the present study has a biological potency of 65.6× NIH-oFSH-S1, or 1640 IU; and 0.1× NIH-oLH-S1, or 106 IU. The oFSH for injection was prepared in saline with 0.05% BSA (w/v; Sigma Chemical Co., St. Louis, MO) and 50% polyvinylpyrrolidone (w/v; Sigma) [12].

### Transrectal Ovarian Ultrasonography and Blood Sampling

In both experiments 1 and 2, the anestrus ewes underwent transrectal ovarian ultrasonography twice daily (0800 and 2000 h) until the largest follicle of the third follicular wave attained its maximum diameter (see below for details), using a real-time B-mode echo camera (Aloka SSD-900; Aloka Co., Ltd., Tokyo, Japan) connected to a 7.5-MHz transducer.

<sup>1</sup>Supported by the Natural Sciences and Engineering Research Council, Canada (N.C.R.). R.D. was supported by a University of Saskatchewan graduate student scholarship.

<sup>2</sup>Correspondence: FAX: 306 966 7376; e-mail: norman.rawlings@usask.ca

<sup>3</sup>Current address: Department of Biomedical Sciences, Ontario Veterinary College, University of Guelph, Guelph, ON, Canada N1G 2W1.

Received: 29 November 2004.

First decision: 10 January 2005.

Accepted: 17 February 2005.

© 2005 by the Society for the Study of Reproduction, Inc.

ISSN: 0006-3363. <http://www.biolreprod.org>

During each examination, the relative position and diameter of all follicles  $\geq 1$  mm in diameter and corpora lutea were sketched onto ovarian charts. In addition, all ovarian images were recorded on high-grade video tapes (Fuji S-VHS, ST-120 N; Fujifilm, Tokyo, Japan) for retrospective analysis of ovarian data. Blood samples (10 ml) were collected from all ewes by jugular venipuncture into vacutainers (Becton Dickinson, Rutherford, NJ) just before each ultrasonographic examination.

### Hormone Analyses

Blood samples were allowed to clot for about 24 h at room temperature and the resultant harvested serum was stored at  $-20^{\circ}\text{C}$  until assayed. Serum concentrations of FSH [20] and estradiol [21] were determined by established radioimmunoassays. Serum concentrations of FSH are expressed in terms of oFSH-SIAFP-RP-2. The ranges of the standards for FSH and estradiol assays were 0.12 to 16.0 ng/ml and 1 to 100 pg/ml, respectively. The sensitivities of the assay (defined as the lowest concentration of hormone capable of significantly displacing labeled hormone from the antibody) were 0.1 ng/ml for FSH assays and 1 pg/ml for estradiol assays. The intraassay and interassay coefficients of variation (CVs) for FSH assays for sera with a concentration of 0.46 ng/ml or 1.37 ng/ml, were 6.5% and 9.1%, or 6.2% and 8.8%, respectively; and for estradiol assays, for sera with a concentration of 3.5 pg/ml or 12.0 pg/ml, the CVs were 16.5% and 7.1% or 14.2% and 8.9%, respectively.

### Experiment 1

Twelve adult, anestrus (June–July) Western White-Face ewes (age, 2–3 yr; mean body weight,  $90.0 \pm 5.6$  kg) were used in this experiment. The ewes were kept outdoors in sheltered pens and were fed daily maintenance rations of alfalfa hay, with water available ad libitum.

Treatment involved two s.c. injections of either oFSH (0.5  $\mu\text{g}/\text{kg}$ ) or vehicle given 8 h apart. This treatment regimen was based on preliminary trials and was shown to result in an FSH peak of physiological amplitude [12]. Six ewes were injected with oFSH (oFSH-treated group) and six control ewes were injected with vehicle only.

A 4-mm follicle that grew from the pool of 2- to 3-mm follicles was detected with ultrasonography, and it was designated as the wave 1 follicle. Such a follicle had to have emerged (and grown beyond the 2- to 3-mm stage) 3–5 days after the emergence of the previous follicular wave (i.e., at the normal time interval for follicular waves in ewes; [9]). The first injection of oFSH or vehicle was given 60 h after the detection of the 4-mm follicle, but only if the follicle had grown to  $\geq 5$  mm to establish a follicular wave; the second injection was given 8 h later. The timing of the treatment was designed to give oFSH or vehicle injections at the expected time of the peak in endogenous FSH concentration associated with the emergence of a follicle wave (designated as wave 2).

The mean serum FSH concentrations in FSH-treated and control ewes from 6 days before to 3 days after the injection of oFSH or vehicle (Day 0) are shown in Figure 1. There was a peak in serum FSH concentrations on Day -4 in both FSH-treated and control ewes ( $P > 0.05$ ), and it was associated with the emergence of follicular wave 1 in both groups (Table 1). The next FSH peak in control ewes occurred on Day 0.5 after treatment ( $2.8 \pm 0.3$  ng/ml; Fig. 1). In FSH-treated ewes, there was a peak in FSH

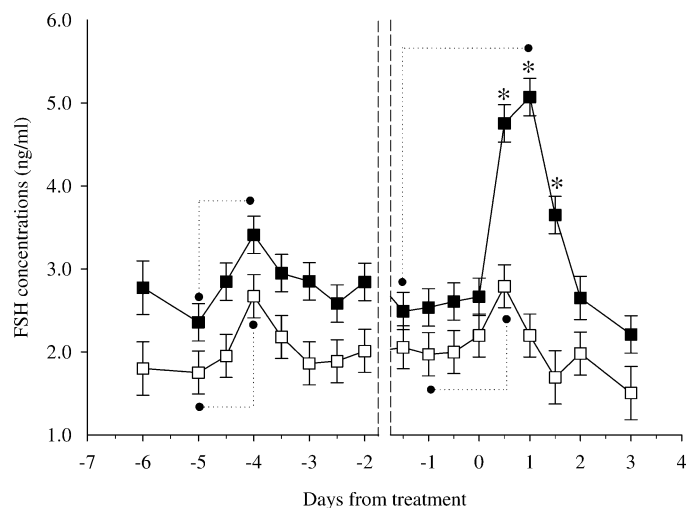

FIG. 1. Mean ( $\pm$  SEM) serum FSH concentrations in FSH-treated (black squares) and control (white squares) ewes ( $n = 6$  per group), from 6 days before to 3 days after treatment (Day 0) with oFSH or vehicle. The ewes were treated 60 h after ultrasonographic detection of the largest follicle of wave 1 at 4 mm in diameter. The treatment was targeted to be administered at the expected time of a peak in endogenous FSH concentrations. FSH concentrations were centralized to the days of FSH peaks, which were Day -4 (left box) and Day 0.5 (right box) in relation to the day of treatment (Day 0), and are shown for Day -6 to Day -2 for the first peak and for Day -1.5 to Day 3 for the second peak. Dotted lines show major statistical trends; the major statistical trends delimit the periods during which there were significant ( $P < 0.05$ ) progressive increases (nadir-to-peak) in mean FSH concentrations. \* $P < 0.05$  (between FSH-treated and control ewes).

concentration on Day 1 after oFSH injection ( $5.1 \pm 0.2$  ng/ml). The FSH concentrations in FSH-treated ewes were significantly higher ( $P < 0.001$ ) from Day 0.5 to Day 1.5 after the treatment, compared with control ewes (Fig. 1). As expected, the FSH peak in FSH-treated ewes was approximately twice as high as in control ewes.

### Experiment 2

Twelve adult, anestrus (May–June) Western White-Face ewes (age, 2 to 3 yr; mean body weight,  $86.1 \pm 1.8$  kg) were used in this experiment.

Treatment, as in experiment 1, involved two s.c. injections of either oFSH (0.5  $\mu\text{g}$  per kg) or vehicle given 8 h apart. Six ewes were injected with oFSH (oFSH-treated group) and six control ewes were injected with vehicle only.

A 4-mm follicle, which grew from the pool of 2- to 3-mm follicles, was detected with ultrasonography, and it was designated as the wave 1 follicle. The first injection of the first treatment with oFSH or vehicle was

TABLE 1. Mean ( $\pm$  SEM) days of wave emergence, the number of follicles per wave and characteristics of the largest follicle of the waves that emerged before (wave 1) or after (waves 2 and 3) treatment, in oFSH-treated and control ewes during anestrus (experiment 1).

| Variable                                  | Group <sup>c</sup> | Wave 1         | Wave 2        | Wave 3         |
|-------------------------------------------|--------------------|----------------|---------------|----------------|
| Day of wave emergence <sup>a</sup>        | Treatment          | $-3.4 \pm 0.3$ | $0.5 \pm 0.0$ | $5.7 \pm 1.0$  |
|                                           | Control            | $-3.5 \pm 0.0$ | $0.7 \pm 0.2$ | $5.8 \pm 1.4$  |
| Length of growth phase (d)                | FSH-treated        | $2.7 \pm 0.2$  | $2.9 \pm 0.2$ | $2.7 \pm 0.2$  |
|                                           | Control            | $2.5 \pm 0.2$  | $2.9 \pm 0.2$ | $3.0 \pm 0.2$  |
| Length of static phase (d)                | FSH-treated        | $3.0 \pm 0.4$  | $2.3 \pm 0.4$ | Not determined |
|                                           | Control            | $2.5 \pm 0.1$  | $2.9 \pm 0.1$ | Not determined |
| Maximum diameter (mm)                     | FSH-treated        | $5.7 \pm 0.4$  | $5.9 \pm 0.4$ | $5.7 \pm 0.4$  |
|                                           | Control            | $5.9 \pm 0.5$  | $6.0 \pm 0.5$ | $5.5 \pm 0.5$  |
| Growth rate (mm/d)                        | FSH-treated        | $1.2 \pm 0.1$  | $1.1 \pm 0.1$ | $1.2 \pm 0.1$  |
|                                           | Control            | $1.2 \pm 0.1$  | $0.9 \pm 0.1$ | $1.2 \pm 0.1$  |
| Number of follicles per wave <sup>b</sup> | FSH-treated        | $2.4 \pm 0.2$  | $1.9 \pm 0.1$ | $2.0 \pm 0.1$  |
|                                           | Control            | $2.1 \pm 0.2$  | $2.0 \pm 0.1$ | $2.2 \pm 0.1$  |

<sup>a</sup> Days of wave emergence are expressed relative to the day of treatment (d 0).

<sup>b</sup> Number of follicles that emerged at 2–3 mm in diameter and grew together to reach an ovulatory diameter of  $\geq 5$  mm.

<sup>c</sup> The ewes ( $n = 6$  per group) were treated with either oFSH or vehicle at the expected time of the peak in serum FSH concentrations, which was associated with the emergence of wave 2.

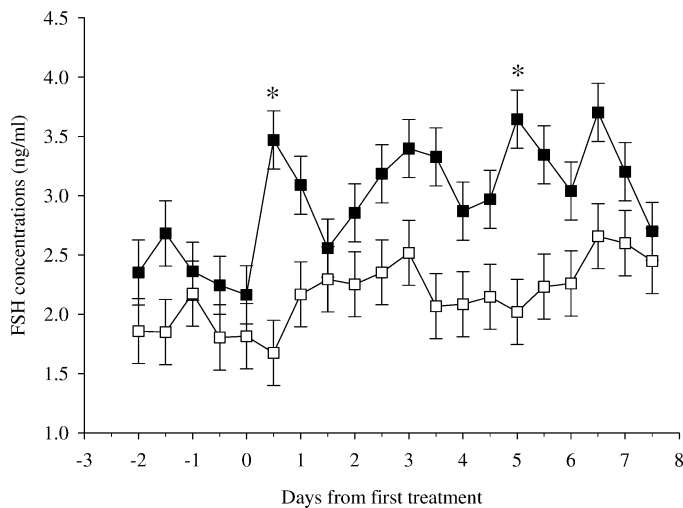

FIG. 2. Mean ( $\pm$  SEM) serum FSH concentrations in FSH-treated (black squares) and control (white squares) ewes ( $n = 6$  per group), from 2 days before to 7.5 days after first treatment (Day 0) with oFSH or vehicle. The ewes were treated 12 h after ultrasonographic detection of the largest follicle of waves 1 and 2 at 4 mm in diameter. The treatments were targeted to be administered at the expected times of 2 consecutive nadirs in endogenous FSH concentrations. Asterisks denote significant ( $P < 0.05$ ) differences between FSH-treated and control ewes.

given 12 h after the detection of the 4-mm follicle of wave 1, but only if this follicle remained at 4 mm or grew further. The second injection was given 8 h later. The follicular wave induced in the FSH-treated ewes by exogenous oFSH was designated wave A. Based on our previous study [12], the following wave, induced by endogenous FSH secretion and designated as wave 2, was expected to emerge at a normal interwave interval of 4 to 5 days after the day of emergence of wave 1. Once the largest follicle of wave 2 was first identified at 4 mm in diameter, the second treatment with oFSH or vehicle was begun, but only if this follicle remained at 4 mm or grew further. The first injection of the second treatment with oFSH or vehicle was given 12 h after the detection of the 4-mm follicle of wave 2 and the second injection was given 8 h later. The follicular wave induced by the second FSH injection was designated as wave B.

The next follicular wave induced by endogenous FSH secretion was designated as wave 3. Timing of the treatments was designed to give oFSH injections during the growth phase of the largest follicle of waves 1 and 2, and at the expected time of the 2 consecutive interwave nadirs (between waves 1 and 2, and waves 2 and 3) in endogenous FSH secretion. This regimen produced 5 peaks in serum FSH concentrations over a time period when only 3 peaks should have occurred.

The mean serum concentrations of FSH from 2 days before to 7.5 days after the first treatment with oFSH or vehicle (Day 0) in FSH-treated and control ewes are given in Figure 2. The first treatment was administered on Day 0 in both the groups of ewes and the second treatment was administered on Day  $4.3 \pm 0.5$  after the first treatment. There were peaks in FSH concentration in FSH-treated ewes on Day 0.5 and Day 5.0 ( $P < 0.01$ ;  $3.5 \pm 0.3$  ng/ml and  $3.7 \pm 0.3$  ng/ml, respectively; Fig. 2) compared with nadirs of FSH concentrations in control ewes on Day 0.5 and Day 5.0 ( $1.7 \pm 0.3$  ng/ml and  $2.0 \pm 0.3$  ng/ml, respectively; Fig. 2).

### Experiment 3

Cyclic Suffolk ( $n = 5$ ) and Western White Face ( $n = 8$ ) ewes were used in this experiment. Blood samples were collected daily for one estrous cycle (October–November) from the 5 Suffolk ewes (period A). Ovariectomy was performed on all ewes on Days 2–3 after ovulation in the following cycle. Blood samples were collected daily from the 5 ovariectomized Suffolk ewes for three separate 17-day periods; first, immediately following ovariectomy (November; period B); second, 2 mo after ovariectomy (January; period C); and third, during the following anestrus period (June; period D). Following ovariectomy, the other group of 8 Western White Face ewes was rested for a 17-day period, without any blood sampling, to allow for the postovariectomy increase and stabilization in serum FSH concentrations. Following the rest period, intravaginal sponges containing medroxyprogesterone acetate (60 mg; Veramix; Upjohn, Orangeville, ON, Canada) were inserted. Four days after sponging,

each of the 8 ewes was fitted with a 5-cm silastic rubber implant (Dow Corning, Midland, MI) containing estradiol-17 $\beta$  (10% w/w; Sigma) [21], which remained in place for 10 days. On Day 10, both the sponge and implant were removed from the Western White Face ewes. Blood samples were collected daily from the day of insertion of estradiol implants (Day 0) to 1 day following sponge and implant removal (Day 11; period E).

### Follicular Data Analysis

Follicular data were analyzed for experiments 1 and 2. A follicular wave consisted of a follicle or a group of follicles that emerged and grew from 2 or 3 mm in diameter to  $\geq 5$  mm (growth phase) and remained at their maximum diameter (static phase) before regressing to 2 or 3 mm in diameter (regression phase) [6]. Follicles emerging within a 24-h period were included in a wave [11]. The following follicular characteristics were analyzed: 1) time of emergence of the follicular waves before and after treatment (expressed in relation to the day of treatment); 2) intervals between emergence of two successive follicular waves (interwave intervals); 3) number of follicles growing from 2 to 3 mm to  $\geq 5$  mm diameter per wave; 4) maximum diameter attained by the largest follicle of a follicular wave; and 5) durations of growing, static, and regression phases for the largest follicle of a wave. In addition, daily numbers of small follicles ( $\geq 1$  mm but  $\leq 3$  mm in diameter) were noted for each ewe. The data for small ovarian antral follicles were centralized and analyzed as described for serum FSH concentrations in experiments 1 and 2 (see below for details).

### Hormone Data Analysis

Serum FSH concentrations were centralized to the day of treatment (Day 0) and analyzed for the periods from 6 days before to 3 days after the treatment for experiment 1, and from 2 days before to 7.5 days after the first treatment (Day 0) for experiment 2. For experiment 3, daily serum FSH concentrations in ovary-intact ewes (period A) were centralized to the day of ovulation (Day 0), while serum FSH concentrations in ovariectomized ewes were centralized to the first day of blood sampling (Day 0; periods B, C, D, and E). Serum FSH concentrations in experiment 3 were analyzed for the period from Day 0 to Day 17 of blood sampling. Peaks in daily serum concentrations of FSH, in all the 3 experiments, were determined using the cycle-detection program [22]. As expected [21, 23], the overall mean serum concentrations of FSH increased after ovariectomy, reaching concentrations of 7 to 20 ng/ml, depending on the time after ovariectomy.

The cycle-detection program uses the mean FSH concentration for the data set and the CV of the FSH assay to determine peaks in serum FSH concentrations [22]. The CVs of our assays for experiment 3 ranged from 3% to 5%. The basal FSH concentrations postovariectomy had increased by 350% during period B and by 500% during period C compared with ovary-intact ewes during period A of blood sampling. The amplitude of FSH peaks in ewes has been reported to be about 1 to 2 ng/ml [2, 6, 8]. Applied to the data of the present experiment (experiment 3), the cycle-detection program did not identify many apparent peaks in serum FSH concentrations in ovariectomized ewes, while it identified all the peaks in serum FSH concentrations in ovary-intact ewes. To ensure that the program detected peaks in daily serum FSH concentrations of the magnitude seen in normal ovary-intact ewes, but in the face of elevated basal concentrations of FSH postovariectomy, the daily serum concentrations of FSH in all the ewes in experiment 3 (including ovary-intact ewes of period A) were transformed. The transformation of FSH data was intended to correct the high mean FSH values in ovariectomized ewes to those observed in ovary-intact ewes.

To achieve this, a constant ( $k$ ) value was subtracted from each FSH value in a data set of serum FSH concentrations in each ewe. The constant,  $k$ , for each FSH data set was determined by using the formula  $k = \text{FSH mean} - 1.9$ , where FSH mean is the mean serum FSH concentration for a ewe during a period of blood sampling, and 1.9 is the overall mean FSH concentration for ovary-intact ewes (period A; Fig. 5A). This transformation effectively removed the high basal values for FSH concentrations but retained the variation due to peaks in hormone concentrations. The transformed FSH data set was then subjected to the cycle-detection program. The following variables for serum FSH concentrations were analyzed in experiment 3: 1) overall mean concentrations of FSH (nontransformed data) for each period of blood sampling, 2) number of FSH peaks in the transformed data identified by the cycle-detection program, 3) amplitude of FSH peaks in the transformed data identified by the cycle-detection program, and 4) interpeak intervals in the transformed data for each period of blood sampling. Serum estradiol concentrations in the ovariectomized ewes treated with estradiol-releasing implants were cen-

TABLE 2. Mean days on which peaks in serum FSH concentrations were detected, using the cycle detection computer program, and mean days of emergence of follicular waves in FSH-treated and control ewes (n = 6 per group; experiment 2), in relation to the day of first treatment (d 0).<sup>a</sup>

| Variable              | Group <sup>b</sup> | Peak 1     | Peak A    | Peak 2                    | Peak B                   | Peak 3                   |
|-----------------------|--------------------|------------|-----------|---------------------------|--------------------------|--------------------------|
| Day of FSH peak       | FSH-treated        | -1.5 ± 0.1 | 0.5 ± 0.0 | 3.0 ± 0.2<br>(-1.2 ± 0.2) | 5.0 ± 0.0<br>(0.5 ± 0.0) | 7.4 ± 0.1<br>(3.0 ± 0.3) |
|                       | Control            | -1.5 ± 0.2 | No peak A | 2.9 ± 0.2<br>(-1.5 ± 0.2) | No peak B                | 7.3 ± 0.5<br>(2.5 ± 0.6) |
| Day of wave emergence | FSH-treated        | -1.3 ± 0.1 | 0.6 ± 0.1 | 2.9 ± 0.2<br>(-1.4 ± 0.2) | 4.8 ± 0.2<br>(0.7 ± 0.1) | 7.4 ± 0.1<br>(3.0 ± 0.3) |
|                       | Control            | -1.4 ± 0.2 | No wave A | 2.9 ± 0.1<br>(-1.4 ± 0.1) | No wave B                | 7.3 ± 0.5<br>(2.8 ± 0.6) |

<sup>a</sup> All values are mean ± SEM. Values in parentheses are the mean days in relation to the day of the second treatment.

<sup>b</sup> The anestrus ewes were treated with oFSH or vehicle during the growth phase of the largest follicle in waves 1 and 2.

tralized to the day of implant insertion and analyzed for the period of the day of implant insertion (Day 0) to Day 11.

### Statistical Analyses

Statistical differences were assessed by one-way or two-way analysis of variance (ANOVA) (SigmaStat Statistical Software, version 2.0 for Windows 95, NT and 3.1, 1997; Chicago, IL). Repeated-measures ANOVA was used when data were collected repeatedly over a period of time. Multiple comparisons were made with the Fisher least significant difference method. Results are reported as least square means and SEM. Statistical significance was defined as  $P < 0.05$ .

## RESULTS

### Experiment 1

**Emergence of follicular waves.** The mean days of emergence of follicular waves (waves 1, 2, and 3) in relation to the day of treatment (Day 0) with oFSH or vehicle (Table 1) did not differ significantly between the groups ( $P > 0.05$ ). The interwave interval between waves 1 and 2 did not differ between FSH-treated and control ewes ( $P > 0.05$ ; 4.2 ± 0.3 days vs. 4.5 ± 0.2 days, respectively). Likewise, the interwave interval between wave 2 that emerged immediately after treatment and the following wave 3 did not differ between the two groups of ewes ( $P > 0.05$ ; 5.2 ± 1.0 day in FSH-treated ewes vs. 5.3 ± 2.0 days in control ewes). The mean daily numbers of small follicles (≥1 mm and ≤3 mm in diameter) did not vary ( $P > 0.05$ ) with time, from 6 days before to 3 days after treatment, and did not differ between the two groups of ewes studied ( $P > 0.05$ ). The overall mean numbers of small follicles for the period of analysis (which encompassed the emergence of waves 1 and 2; Table 1) were 13.9 ± 1.5 (range, 11 to 16) and 14.1 ± 1.6 (range, 11 to 16) in FSH-treated and control ewes, respectively.

**Characteristics of follicular waves.** The growth characteristics of the largest follicles of waves 1, 2, and 3 are given in Table 1. There was no difference ( $P > 0.05$ ) between FSH-treated and control ewes in the duration of the growth and static phases, maximum diameter, and growth rate of the largest follicle in waves 1, 2, and 3. Likewise, the number of follicles that grew together from 2 to 3 mm to ≥5 mm to constitute a follicular wave did not differ ( $P > 0.05$ ) between the two groups of ewes nor between follicular waves within each group of ewes (Table 1).

### Experiment 2

**Days of FSH peaks and the emergence of follicular waves.** The mean days on which peaks in FSH concentrations were detected using the cycle-detection program and

mean days of follicular wave emergence are given in Table 2. The mean interval between days of emergence of successive follicular waves (waves 1, A, 2, B, and 3 in FSH-treated ewes and waves 1, 2, and 3 in control ewes) was significantly shorter in FSH-treated ewes (2.2 ± 0.1 day;  $P < 0.001$ ) than in control ewes (4.1 ± 0.2 day). However, if only the waves associated with endogenous FSH peaks (waves 1, 2, and 3) were considered in both the groups of ewes, then the interwave interval did not differ ( $P > 0.05$ ) between FSH-treated and control ewes. The mean interwave intervals between waves 1 and 2, and waves 2 and 3 were 4.4 ± 0.5 day and 4.5 ± 0.5 day, and 4.4 ± 0.3 day and 4.2 ± 0.3 day in FSH-treated and control ewes, respectively. The mean daily numbers of small follicles (≥1 mm and ≤3 mm in diameter) did not vary ( $P > 0.05$ ) with time from 2 days before to 7.5 days after the first treatment, and did not differ between the two groups of ewes studied ( $P > 0.05$ ). The overall mean numbers of small follicles for the period of analysis (which encompassed the emergence of waves 1, A, 2, B, and 3 in FSH-treated ewes and waves 1, 2, and 3 in control ewes; Table 2) were 14.9 ± 2.5 (range, 12 to 18) and 15.6 ± 1.9 (range, 12 to 17) in FSH-treated and control ewes, respectively.

**Characteristics of follicular waves.** The growth characteristics of the largest follicles of waves 1, A, 2, B, and 3 in FSH-treated ewes and of waves 1, 2, and 3 in control ewes are given in Table 3. Diameter profiles of the largest follicles during the growth phase of waves are shown in Figure 3. There was no difference ( $P > 0.05$ ) in the duration of the growth and static phases, maximum diameter and growth rate of the largest follicle in waves 1, 2, and 3 between FSH-treated and control ewes, and no difference ( $P > 0.05$ ) between endogenous (waves 1, 2, and 3) and induced (waves A and B) follicular waves in FSH-treated ewes. Likewise, the number of follicles that grew together from 2 to 3 mm to ≥5 mm and that constituted a follicular wave did not differ ( $P > 0.05$ ) between the two groups of ewes nor among follicular waves within each group of ewes (Table 3).

### Experiment 3

Transformed values for daily serum FSH concentrations in representative ewes for each period of blood sampling are shown in Figure 4. Mean serum estradiol concentrations during the period of treatment with estradiol-releasing implants in ovariectomized ewes are overlaid on daily serum FSH concentrations in a representative ewe (Fig. 4E). The overall mean concentrations of FSH during each period of blood sampling were significantly higher ( $P < 0.05$ ) in

TABLE 3. The number of follicles per wave and characteristics of the largest follicle of the waves that emerged before or after treatment in oFSH-treated and control ewes during anestrus (experiment 2).<sup>a</sup>

| Variable                                  | Group <sup>c</sup> | Wave 1    | Wave A    | Wave 2    | Wave B    | Wave 3         |
|-------------------------------------------|--------------------|-----------|-----------|-----------|-----------|----------------|
| Duration of growth phase (d)              | FSH-treated        | 2.6 ± 0.2 | 2.9 ± 0.1 | 2.8 ± 0.1 | 2.6 ± 0.2 | 2.7 ± 0.2      |
|                                           | Control            | 2.8 ± 0.2 | No wave A | 3.1 ± 0.1 | No wave B | 2.5 ± 0.2      |
| Duration of static phase (d)              | FSH-treated        | 3.1 ± 0.4 | 3.2 ± 0.4 | 3.1 ± 0.4 | 3.2 ± 0.4 | Not determined |
|                                           | Control            | 3.0 ± 0.1 | No wave A | 3.0 ± 0.1 | No wave B | Not determined |
| Maximum diameter (mm)                     | FSH-treated        | 5.5 ± 0.4 | 5.9 ± 0.4 | 5.2 ± 0.4 | 5.6 ± 0.4 | 5.7 ± 0.4      |
|                                           | Control            | 5.6 ± 0.5 | No wave A | 5.7 ± 0.5 | No wave B | 5.9 ± 0.5      |
| Growth rate (mm/d)                        | FSH-treated        | 1.2 ± 0.1 | 1.1 ± 0.1 | 1.3 ± 0.1 | 1.1 ± 0.1 | 1.3 ± 0.1      |
|                                           | Control            | 1.2 ± 0.1 | No wave A | 1.2 ± 0.1 | No wave B | 1.2 ± 0.1      |
| Number of follicles per wave <sup>b</sup> | FSH-treated        | 2.4 ± 0.2 | 1.9 ± 0.1 | 2.9 ± 0.1 | 1.6 ± 0.1 | 1.9 ± 0.3      |
|                                           | Control            | 2.1 ± 0.2 | No wave A | 2.7 ± 0.1 | No wave B | 1.3 ± 0.3      |

<sup>a</sup> All values are mean ± SEM.

<sup>b</sup> Number of follicles that emerged at 2-3 mm diameter and grew together to reach an ovulatory diameter of ≥ 5 mm.

<sup>c</sup> The anestrus ewes were treated with oFSH or vehicle during the growth phase of the largest follicle in waves 1 and 2.

ovariectomized ewes compared with ovary-intact ewes (Fig. 5A). Mean FSH concentration increased with time after ovariectomy as indicated by the significant difference ( $P < 0.05$ ) between the control period (period A) and a period immediately following ovariectomy (period B), 2 mo after ovariectomy (period C), during the following anestrus (period D), and during the treatment with estradiol-releasing implants (period E). There were no significant differences ( $P > 0.05$ ) in the number of FSH peaks detected (Fig. 5B), the amplitude of FSH peaks (Fig. 5C), or inter-peak intervals (Fig. 5D) among the periods of blood sampling.

## DISCUSSION

In a previous study from our laboratory [12] we demonstrated the possibility of inducing the emergence of a new follicular wave by exogenous oFSH in both cyclic and anestrus ewes. Previously, it was shown that the patterns of peaks in serum FSH concentrations and associated follicular waves are remarkably similar between cyclic and anestrus ewes [9, 10]. In the present study (experiments 1 and 2), the use of anestrus ewes was justified, as their endocrine milieu is not complicated by changes in progesterone concentrations and LH secretory pattern.

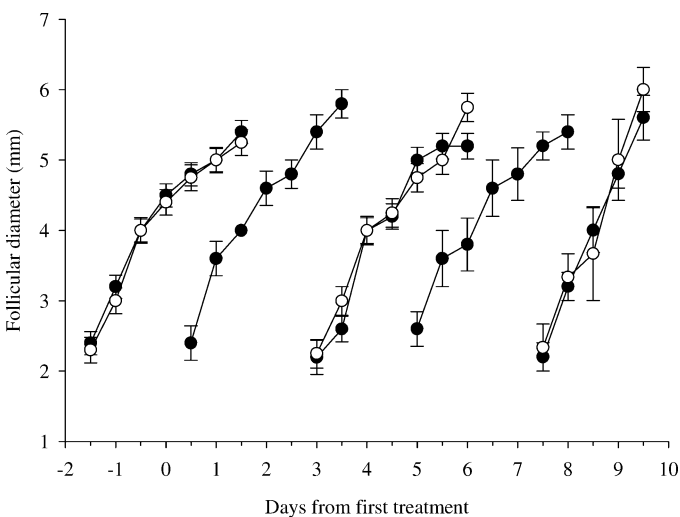

FIG. 3. Diameter profiles (means ± SEM), during the growth phases, of the largest follicles of waves 1, A, 2, B, and 3 in FSH-treated ewes (black circles;  $n = 6$ ) and of waves 1, 2, and 3 in control ewes (white circles;  $n = 6$ ). The diameter profiles were centralized to the mean day of emergence of individual waves.

Our regimen of oFSH administration in experiment 1, as expected, doubled the amplitude of the endogenous FSH peak preceding a follicular wave in anestrus ewes (Fig. 1). However, none of the growth characteristics of the largest follicles of the FSH-induced wave (FSH-treated ewes)

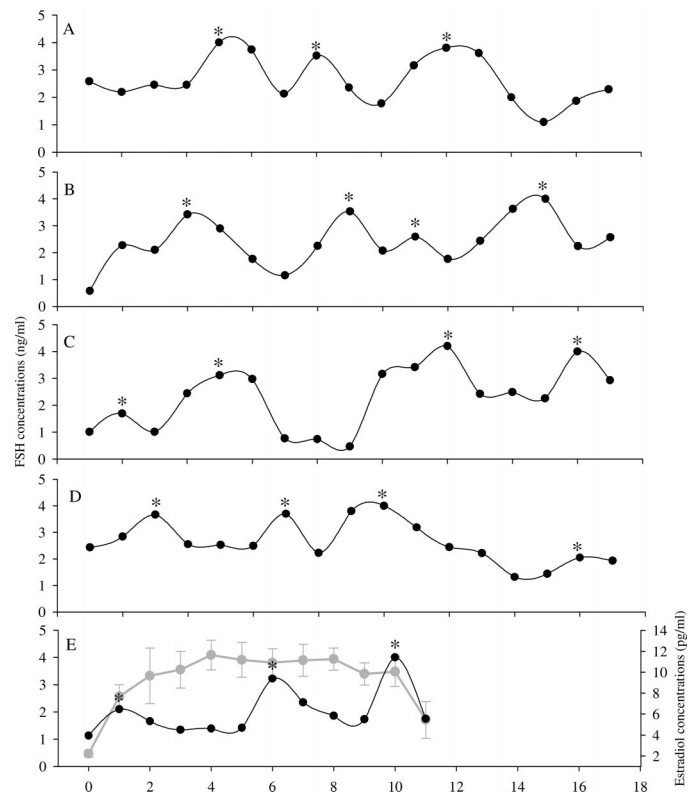

FIG. 4. Daily serum FSH concentrations in representative ewes from all periods of bleeding including the control period (ovary-intact ewes; period A), immediately after ovariectomy (period B), 2 mo after ovariectomy (period C), the following anestrus (period D), and a period of treatment with estradiol-releasing implants (separate group of ewes; period E). Asterisks denote successive FSH peaks as determined with the cycle-detection program [22]. To ensure that the cycle-detection program detected peaks in daily serum FSH concentrations, of the magnitude seen in normal intact ewes but in the face of elevated basal concentrations of FSH, the daily serum concentrations of FSH in all the ewes in experiment 3 (including ovary-intact ewes of period A) were transformed. The transformation of FSH data were intended to correct the high mean FSH values in ovariectomized ewes to those seen in ovary-intact ewes (see text for details). Mean (± SEM) daily concentrations of estradiol in the group of ewes treated with estradiol-releasing implants are overlaid on the daily FSH concentrations in a representative ewe (E).

differed in comparison to the largest follicles of the corresponding wave in vehicle treated ewes (Table 1).

Suppression of the secondary surge in FSH secretion, after the preovulatory gonadotropin surge, blocks the emergence of the first follicular wave of the cycle in heifers [24]. Injection of a superovulatory dose of FSH before the selection of a dominant follicle in heifers increases the diameter of the subordinate follicles while it decreases the diameter of the dominant follicle [25]. A superovulatory dose of FSH stimulates the growth of multiple ovulatory-sized follicles in sheep [16–19]. However, the effects of superovulatory doses of FSH are not physiological. There is a great deal of evidence that FSH is the key regulator of recruitment of follicles into waves in most species, and in the ewe, there is a threshold of FSH concentration below which recruitment cannot proceed [15]. This threshold appears to vary among ewes [26] and among follicles within a specific ewe [27]. In the present study (experiment 1), doubling the concentrations of FSH in the peaks that precede follicular waves did not affect either the number or the growth characteristics of small, nonrecruited follicles or FSH-dependent follicles recruited into a wave. Thus, it is logical to argue that serum FSH concentrations within a physiological range do not necessarily correlate with the number of ovulatory-sized follicles growing in a wave. Several lines of evidence further support this argument. No study, as yet, has shown a correlation between serum FSH concentrations and the number of follicles recruited into a wave [15, 28]. Previous studies [27, 29–31] have reported no differences either in mean circulating FSH concentrations or in the concentration and duration of the FSH peaks that precede follicular waves [5, 6] between prolific and nonprolific breeds of sheep. In homozygous Booroola *FECB* gene carrier ewes, the serum FSH concentrations have been shown to be higher than in noncarrier ewes [32–34]. However, it has been suggested that the *FECB* gene exerts its effects at the ovarian level by increasing the follicular sensitivity to FSH rather than by increasing pituitary FSH secretion [35, 36]. It would be of interest to examine the effects of the *FECB* gene on the characteristics of peaks in serum FSH concentrations that precede follicular wave emergence.

In cattle, cauterization of the dominant follicle of the first wave advances the emergence of the second wave of the cycle [37]. This indicates that, in cattle, the lifespan of the dominant follicle influences the time of occurrence of the next endogenous FSH peak [38]. Such a concept has also been suggested for sheep [39–41]. However, this concept was not supported in the sheep by a recent study [12], wherein the largest follicle (apparent dominant follicle) of a wave induced by exogenous oFSH did not postpone the next endogenous FSH peak and emergence of a follicular wave. In the present study (experiment 2), the emergence of waves A and B (induced waves) did not alter the time of occurrence of the endogenous FSH peaks that preceded the emergence of waves 2 and 3 (endogenous waves; Fig. 2 and Table 2). Waves 2 and 3 clearly emerged during the growth phases of waves A and B. The results of experiment 2 strongly support the notion that serum FSH concentrations in sheep may not be under the stringent control of growing antral follicles [12].

In studies on superovulation in sheep, the presence of a large follicle may [42] or may not [43, 44] affect the ewe's response to a superovulatory treatment. Similarly, in cattle, there are contradictory reports [45] that support [46–49] or fail to support [50–52] the inhibitory effects of the presence

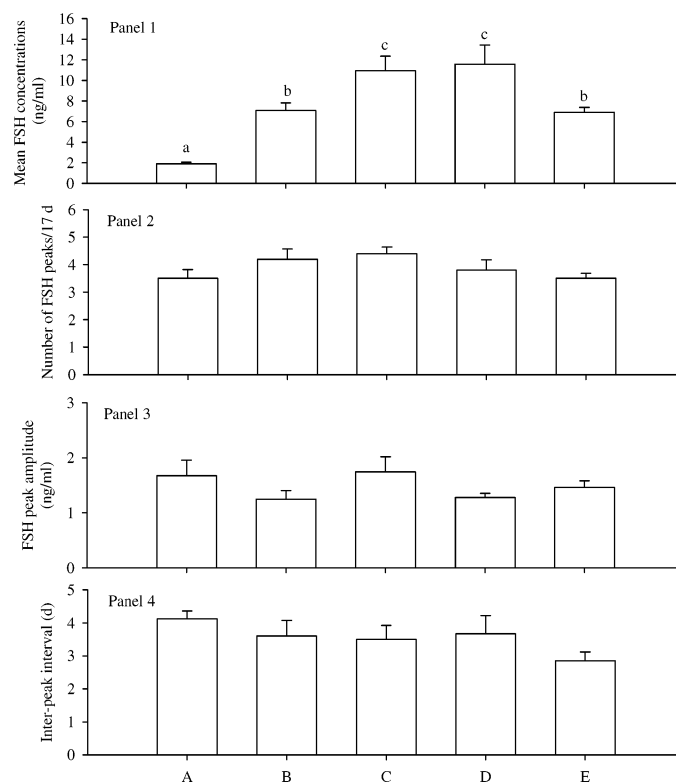

FIG. 5. Overall mean concentration of FSH (1), number of FSH peaks (2), FSH peak amplitude (3), and interpeak interval (4) for the 17-day periods of blood sampling (periods A, B, C, D, and E;  $n = 5-8$  ewes). All values are means  $\pm$  SEM. Daily blood samples were collected from a group of 5 ewes for one estrous cycle and these ewes were ovariectomized on Day 2–3 after ovulation in the following cycle. Daily blood samples were also collected during the three 17-day periods: immediately after ovariectomy (period B), 2 mo after ovariectomy (period C), and during the following anestrus (period D). A separate group of 8 ovariectomized ewes was treated with estradiol-releasing implants and daily blood samples were collected for a 10-day period (period E). <sup>a-c</sup>Means denoted by different letters differ ( $P < 0.05$ ).

of a dominant follicle on the superovulatory response. In experiment 2, it could be argued that the induction of additional follicular waves (waves A and B) by exogenous oFSH overrode the dominance of the largest follicles of the noninduced (endogenous) follicular waves (waves 1, 2, and 3). However, the noninduced follicular waves (waves 2 and 3) in FSH-treated ewes emerged during the growth phase of the largest follicles of waves A and B (Fig. 3). The growth characteristics of the largest follicles of the induced follicular waves in the present study did not differ from those of the largest follicles of the noninduced follicular waves in both FSH-treated and control ewes (Table 3). Previously, we have shown that the largest follicles of oFSH-induced follicular waves were associated with normal peaks in estradiol concentrations as compared with endogenous follicular waves in both FSH-treated and control ewes [12]. These observations indicate that the largest estrogen-producing (presumptive dominant) follicles of waves A and B were not effective in postponing the occurrence of the next endogenous FSH peaks and follicular waves in experiment 2. The uninterrupted emergence of 5 follicular waves in FSH-treated ewes in the time frame of the emergence of 3 follicular waves in control ewes suggested that small FSH-sensitive follicles are available on a daily basis to enter a wave in response to a physiological FSH stimulus. This supposition is supported by our previous observation that

the pool of small follicles (1 to 3 mm in diameter) remains constant, except during the periovulatory period, despite the rhythmic emergence of 3 to 4 follicular waves in each ovine estrous cycle [11]. The concept of follicular dominance does not appear to be as convincing in the ewe as it is in cattle [11, 15, 27, 44, 53]; at least in breeds of sheep, which are strictly monovulatory [40, 41]. Taken together, it appears that the large ovulatory-sized follicles in a wave in sheep do not exert dominance to the extent observed in cattle.

Several studies have demonstrated that FSH secretion is regulated by factors produced by growing antral follicles such as estradiol [21, 54–57] and inhibin [23, 58]. The studies showing negative effects of estradiol treatment on pituitary FSH secretion in ovary-intact [57] or ovariectomized [21] ewes have largely used high (supraphysiological) doses of estradiol. At physiological levels, an inverse temporal relationship between serum concentrations of estradiol and FSH in association with the growth of follicular waves has been demonstrated during the breeding season [6, 59], but not during anestrus [9, 10, 60, 61]. However, peaks in FSH concentrations and associated follicular waves in sheep have been observed during both the breeding and nonbreeding seasons [1, 9, 10, 60–62]. The studies showing a negative effect of inhibin on FSH secretion have used various preparations such as follicular fluid (crude inhibin) [63] or human recombinant inhibin A [64], or passive immunization against inhibin [23]. It appears there are no negative relationships between circulating concentrations of inhibin and FSH in physiologically uncompromised ewes [3, 10]. In addition, there have been reports that additional follicular factors, other than estradiol and inhibin, can suppress FSH and follicular growth [65, 66]. A steroid-depleted fraction of follicular fluid suppressed follicle development in cattle even though the injected follicular fluid was >95% free of inhibin [65]. In one other study [66] in heifers, follicular fluid suppressed both FSH secretion and follicular growth despite the injection of an inhibin antiserum with the follicular fluid.

In a previous study in cyclic ewes, a 10-day treatment with estradiol-releasing implants designed to raise the serum estradiol concentrations to 2.4-fold that in control ewes resulted in the absence of follicular wave emergence; nevertheless, there were rhythmic but truncated peaks in serum FSH concentrations during the period of treatment compared with that of the control ewes (Barrett, Bartlewski, and Rawlings, unpublished data). A 28-day intravaginal treatment of cyclic ewes with oral contraceptives (each pill containing 150 µg of levonorgestrel or 180 µg of norgestomet and 30 µg of ethinyl estradiol) resulted in the absence of follicular waves and follicular growth beyond 2 mm in diameter in most ewes; however, there were rhythmic peaks in serum FSH concentrations similar to those in the control ewes that received inert pills (Bartlewski, Duggavathi, and Rawlings, unpublished data). Based on the observations above, and from the present results of experiments 1 and 2, we hypothesized that there was an endogenous rhythm of peaks in daily serum concentrations of FSH which was, at least in part, independent of regulation by the ovarian follicular growth pattern. This hypothesis is supported by the results of experiment 3, in which we observed peaks in serum FSH concentrations in serum samples collected daily in ovariectomized ewes (Fig. 4). These peaks were similar to those in ovary-intact ewes in terms of peak amplitude and interpeak intervals, even in the face of elevated basal FSH concentrations postovariectomy (Fig. 5).

In summary, doubling the amplitude of the FSH peak that precedes the emergence of a follicular wave did not alter the characteristics of the resulting follicular wave in anestrus sheep. Creation of physiological peaks of serum FSH concentrations every 2–2.5 days stimulated the emergence of additional follicular waves but did not alter the rhythmic occurrence of FSH peaks and follicular wave emergence. Follicular waves resulting from endogenous peaks in FSH secretion emerged and grew in the presence of the growing largest follicle of the follicular waves induced by exogenous oFSH, bringing the concept of follicular dominance in the ewe into question. In sexually mature, nonpregnant sheep, the ovary appears to contain small follicles (2 to 3 mm in diameter) capable of responding to a physiological increase in FSH secretion to produce a follicular wave on a daily basis. Finally, it seems that there is an endogenous rhythm of peaks in daily serum FSH concentrations, which is, at least in part, independent of regulation by ovarian follicular growth patterns.

## ACKNOWLEDGMENTS

The authors thank Ms. Susan Cook and Dr. Edward Bagu for their help in blood sampling and radioimmunoassays.

## REFERENCES

- Noel B, Bister JL, Paquay R. Ovarian follicular dynamics in Suffolk ewes at different periods of the year. *J Reprod Fertil* 1993; 99:695–700.
- Ginther OJ, Kot K, Wiltbank MC. Associations between emergence of follicular waves and fluctuations in FSH concentrations during the estrous cycle in ewes. *Theriogenology* 1995; 43:689–703.
- Souza CJ, Campbell BK, Baird DT. Follicular waves and concentrations of steroids and inhibin A in ovarian venous blood during the luteal phase of the oestrous cycle in ewes with an ovarian autotransplant. *J Endocrinol* 1998; 156:563–572.
- Leyva V, Buckrell BC, Walton JS. Regulation of follicular activity and ovulation in ewes by exogenous progestagen. *Theriogenology* 1998; 50:395–416.
- Gibbons JR, Kot K, Thomas DL, Wiltbank MC, Ginther OJ. Follicular and FSH dynamics in ewes with a history of high and low ovulation rates. *Theriogenology* 1999; 52:1005–1020.
- Bartlewski PM, Beard AP, Cook SJ, Chandolia RK, Honaramooz A, Rawlings NC. Ovarian antral follicular dynamics and their relationships with endocrine variables throughout the oestrous cycle in breeds of sheep differing in prolificacy. *J Reprod Fertil* 1999; 115:111–124.
- Vinolas C, Meikle A, Forsberg M, Rubianes E. The effect of subluteal levels of exogenous progesterone on follicular dynamics and endocrine patterns during early luteal phase of the ewe. *Theriogenology* 1999; 51:1351–1361.
- Evans ACO, Duffy P, Hynes N, Boland MP. Waves of follicle development during the estrous cycle in sheep. *Theriogenology* 2000; 53:699–715.
- Bartlewski PM, Beard AP, Cook SJ, Rawlings NC. Ovarian follicular dynamics during anoestrus in ewes. *J Reprod Fertil* 1998; 113:275–285.
- Evans ACO, Duffy P, Quinn KM, Knight PG, Boland MP. Follicular waves are associated with transient fluctuations in FSH but not estradiol or inhibin-A concentrations in anestrus ewes. *Anim Sci* 2001; 72:547–554.
- Duggavathi R, Bartlewski PM, Barrett DMW, Rawlings NC. Use of high-resolution transrectal ultrasonography to assess changes in numbers of small ovarian antral follicles and their relationships to the emergence of follicular waves in cyclic ewes. *Theriogenology* 2003; 60:495–510.
- Duggavathi R, Bartlewski PM, Barrett DMW, Gratton C, Bagu ET, Rawlings NC. Patterns of antral follicular wave dynamics and accompanying endocrine changes in cyclic and seasonally anestrus ewes treated with exogenous ovine follicle-stimulating hormone during the inter-wave interval. *Biol Reprod* 2004; 70:821–827.
- Bartlewski PM, Beard AP, Rawlings NC. Ovarian function in ewes during the transition from breeding season to anoestrus. *Anim Reprod Sci* 1999; 57:51–66.

14. Bister JL, Noel B, Perrad B, Mandiki SN, Mbayahaga J, Paquay R. Control of ovarian follicles activity in the ewe. *Domest Anim Endocrinol* 1999; 17:315–328.
15. Driancourt MA. Regulation of ovarian follicular dynamics in farm animals. Implications for manipulation of reproduction. *Theriogenology* 2001; 55:1211–1239.
16. Boscos CM, Samartzi FC, Dellis S, Rogge A, Stefanakis A, Krambovitis E. Use of progestagen-gonadotrophin treatments in estrus synchronization of sheep. *Theriogenology* 2002; 58:1261–1272.
17. Gonzalez-Bulnes A, Souza CJH, Campbell BK, Baird DT. Systemic and intraovarian effects of dominant follicles on ovine follicular growth. *Anim Reprod Sci* 2004; 84:107–119.
18. Gonzalez-Bulnes A, Santiago-Moreno J, Cocero MJ, Souza CJ, Groome NP, Garcia-Garcia RM, Lopez-Sebastian A, Baird DT. Measurement of inhibin A and follicular status predict the response of ewes to superovulatory FSH treatments. *Theriogenology* 2002; 57:1263–1272.
19. Riesenbergs S, Meinecke-Tillmann S, Meinecke B. Ultrasonic study of follicular dynamics following superovulation in German Merino ewes. *Theriogenology* 2001; 55:847–865.
20. Currie WD, Rawlings NC. Fluctuation in responsiveness of LH and lack of responsiveness of FSH to prolonged infusion of morphine and naloxone in the ewe. *J Reprod Fertil* 1989; 86:359–366.
21. Joseph IB, Currie WD, Rawlings NC. Effects of time after ovariectomy, season and oestradiol on luteinizing hormone and follicle-stimulating hormone secretion in ovariectomized ewes. *J Reprod Fertil* 1992; 94:511–523.
22. Clifton DK, Steiner RA. Cycle detection: a technique for estimating the frequency and amplitude of episodic fluctuations in blood hormone and substrate concentrations. *Endocrinology* 1983; 112:1057–1064.
23. Mann GE, Campbell BK, McNeilly AS, Baird DT. The role of inhibin and oestradiol in the control of FSH secretion in the sheep. *J Endocrinol* 1992; 133:381–391.
24. Turzillo AM, Fortune JE. Suppression of the secondary FSH surge with bovine follicular fluid is associated with delayed ovarian follicular development in heifers. *J Reprod Fertil* 1990; 89:643–653.
25. Adams GP, Kot K, Smith CA, Ginther OJ. Selection of a dominant follicle and suppression of follicular growth in heifers. *Anim Reprod Sci* 1993; 30:259–271.
26. Picton HM, McNeilly AS. Evidence to support a follicle-stimulating hormone threshold theory for follicle selection in ewes chronically treated with gonadotrophin-releasing hormone agonist. *J Reprod Fertil* 1991; 93:43–51.
27. Fry RC, Driancourt MA. Relationships between follicle-stimulating hormone, follicle growth and ovulation rate in sheep. *Reprod Fertil Dev* 1996; 8:279–286.
28. Driancourt MA, Fry RC. Differentiation of ovulatory follicles in sheep. *J Anim Sci* 1988; 66(suppl 2):9–20.
29. Driancourt MA, Philippon P, Locatelli A, Jacques E, Webb R. Are differences in FSH concentrations involved in the control of ovulation rate in Romanov and Ile-de-France ewes? *J Reprod Fertil* 1988; 83:509–516.
30. Campbell BK, Scaramuzzi RJ, Evans G, Downing JA. Increased ovulation rate in androstenedione-immune ewes is not due to elevated plasma concentrations of FSH. *J Reprod Fertil* 1991; 91:655–666.
31. Boulton MI, Haley CS, Springbett AJ, Webb R. The effect of the Booroola (FecB) gene on peripheral FSH concentrations and ovulation rates during oestrus, seasonal anoestrus and on FSH concentrations following ovariectomy in Scottish Blackface ewes. *J Reprod Fertil* 1995; 103:199–207.
32. Hudson NL, O'Connell AR, Shaw L, Clarke IJ, McNatty KP. Effect of exogenous FSH on ovulation rate in homozygous carriers or non-carriers of the booroola FecB gene after hypothalamic-pituitary disconnection or after treatment with a GnRH agonist. *Domest Anim Endocrinol* 1999; 16:69–80.
33. McNatty KP, Hudson N, Henderson KM, Gibb M, Morrison L, Ball K, Smith P. Differences in gonadotrophin concentrations and pituitary responsiveness to GnRH between Booroola ewes which were homozygous (FF), heterozygous (F+) and non-carriers (++) of a major gene influencing their ovulation rate. *J Reprod Fertil* 1987; 80:577–588.
34. McNatty KP, Fisher M, Collins F, Hudson NL, Heath DA, Ball K, Henderson KM. Differences in the plasma concentrations of FSH and LH in ovariectomized Booroola FF and ++ ewes. *J Reprod Fertil* 1989; 85:705–713.
35. Fry RC, Cahill LP, Cummins JT, Bindon BM, Piper LR, Clarke IJ. The half-life of follicle-stimulating hormone in ovary-intact and ovariectomized booroola and control merino ewes. *J Reprod Fertil* 1987; 81:611–615.
36. Campbell BK, Baird DT, Souza CJ, Webb R. The FecB (Booroola) gene acts at the ovary: in vivo evidence. *Reproduction* 2003; 126:101–111.
37. Ko JC, Kastelic JP, Del Campo MR, Ginther OJ. Effects of a dominant follicle on ovarian follicular dynamics during the oestrous cycle in heifers. *J Reprod Fertil* 1991; 91:511–519.
38. Ginther OJ, Bergfelt DR, Beg MA, Kot K. Role of low circulating FSH concentrations in controlling the interval to emergence of the subsequent follicular wave in cattle. *Reproduction* 2002; 124:475–482.
39. Evans AC, Flynn JD, Duffy P, Knight PG, Boland MP. Effects of ovarian follicle ablation on FSH, oestradiol and inhibin A concentrations and growth of other follicles in sheep. *Reproduction* 2002; 123:59–66.
40. Gonzalez-Bulnes A, Santiago-Moreno J, Garcia-Garcia RM, del Campo A, Gomez-Brunet A, Lopez-Sebastian A. Origin of the preovulatory follicle in Mouflon sheep (*Ovis gmelini musimon*) and effect on growth of remaining follicles during the follicular phase of oestrous cycle. *Anim Reprod Sci* 2001; 65:265–272.
41. Lopez-Sebastian A, de Bulnes AG, Moreno JS, Gomez-Brunet A, Townsend EC, Inskoop EK. Patterns of follicular development during the estrous cycle in monovular Merino del Pais ewes. *Anim Reprod Sci* 1997; 48:279–291.
42. Gonzalez-Bulnes A, Garcia-Garcia RM, Santiago-Moreno J, Dominguez V, Lopez-Sebastian A, Cocero MJ. Reproductive season affects inhibitory effects from large follicles on the response to superovulatory FSH treatments in ewes. *Theriogenology* 2003; 60:281–288.
43. Gonzalez-Bulnes A, Santiago-Moreno J, Cocero MJ, Lopez-Sebastian A. Effects of FSH commercial preparation and follicular status on follicular growth and superovulatory response in Spanish Merino ewes. *Theriogenology* 2000; 54:1055–1064.
44. Driancourt MA, Webb R, Fry RC. Does follicular dominance occur in ewes? *J Reprod Fertil* 1991; 93:63–70.
45. Kafi M, McGowan MR. Factors associated with variation in the superovulatory response of cattle. *Anim Reprod Sci* 1997; 48:137–157.
46. Mapletoft RJ, Steward KB, Adams GP. Recent advances in the superovulation in cattle. *Reprod Nutr Dev* 2002; 42:601–611.
47. Guilbault LA, Grasso F, Lussier JG, Rouillier P, Matton P. Decreased superovulatory responses in heifers superovulated in the presence of a dominant follicle. *J Reprod Fertil* 1991; 91:81–89.
48. Huhtinen M, Rainio V, Aalto J, Bredbacka P, Maki-Tanila A. Increased ovarian responses in the absence of a dominant follicle in superovulated cows. *Theriogenology* 1992; 37:457–463.
49. Bungartz L, Niemann H. Assessment of the presence of a dominant follicle and selection of dairy cows suitable for superovulation by a single ultrasound examination. *J Reprod Fertil* 1994; 101:583–591.
50. Rajamahendran R, Calder MD. Superovulatory responses in dairy cows following ovulation of the dominant follicle of the first wave. *Theriogenology* 1993; 40:99–109.
51. Gray BW, Cartee RE, Stringfellow DA, Riddell MG, Riddell KP, Wright JC. The effects of FSH-priming and dominant follicular regression on the superovulatory response of cattle. *Theriogenology* 1992; 37:631–639.
52. Maciel M, Gustafsson H, Rodriguez-Martinez H. Superovulatory response in lactating cows with different follicular dynamics. *Zentralbl Veterinarmed A* 1995; 42:123–129.
53. Ravindra JP, Rawlings NC, Evans AC, Adams GP. Ultrasonographic study of ovarian follicular dynamics in ewes during the oestrous cycle. *J Reprod Fertil* 1994; 101:501–509.
54. Salamonsen LA, Jonas HA, Burger HG, Buckmaster JM, Chamley WA, Cumming IA, Findlay JK, Goding JR. A heterologous radioimmunoassay for follicle stimulating hormone: application to measurement of FSH in the ovine estrous cycle, and in several other species including man. *Endocrinology* 1973; 93:610–618.
55. Jonas HA, Salamonsen LA, Burger HG, Chamley WA, Cumming IA, Findlay JK, Goding JR. Release of FSH after administration of gonadotrophin-releasing hormone or estradiol to the anestrous ewe. *Endocrinology* 1973; 92:862–865.
56. Joseph IBJK, Ravindra JP, Rawlings NC. Oestradiol and the preovulatory surges of luteinizing hormone and follicle stimulating hormone in ewes during the breeding season and transition into anoestrus. *Anim Reprod Sci* 1995; 40:291–298.
57. Meikle A, Forsberg M, Garofalo EG, Carlsson MA, Lundeheim N, Rubianes E. Circulating gonadotrophins and follicular dynamics in



- anestrous ewes after treatment with estradiol-17[ $\beta$ ]. *Anim Reprod Sci* 2001; 67:79–90.
58. Findlay JK, Drummond AE, Britt KL, Dyson M, Wreford NG, Robertson DM, Groome NP, Jones ME, Simpson ER. The roles of activins, inhibins and estrogen in early committed follicles. *Mol Cell Endocrinol* 2000; 163:81–87.
59. Souza CJH, Campbell BK, Baird DT. Follicular dynamics and ovarian steroid secretion in sheep during the follicular and early luteal phases of the estrous cycle. *Biol Reprod* 1997; 56:483–488.
60. Bartlewski PM, Vanderpol J, Beard AP, Cook SJ, Rawlings NC. Ovarian antral follicular dynamics and their associations with peripheral concentrations of gonadotropins and ovarian steroids in anoestrous Finnish Landrace ewes. *Anim Reprod Sci* 2000; 58:273–291.
61. Souza CJ, Campbell BK, Baird DT. Follicular dynamics and ovarian steroid secretion in sheep during anoestrus. *J Reprod Fertil* 1996; 108:101–106.
62. Leyva V, Buckrell BC, Walton JS. Follicular activity and ovulation regulated by exogenous progestagen and PMSG in anestrous ewes. *Theriogenology* 1998; 50:377–393.
63. McNeilly AS. Effect of changes in FSH induced by bovine follicular fluid and FSH infusion in the preovulatory phase on subsequent ovulation rate and corpus luteum function in the ewe. *J Reprod Fertil* 1985; 74:661–668.
64. Tilbrook AJ, de Kretser DM, Clarke IJ. Changes in the suppressive effects of recombinant inhibin A on FSH secretion in ram lambs during sexual maturation: evidence for alterations in the clearance rate of inhibin. *J Endocrinol* 1999; 161:219–229.
65. Law AS, Baxter G, Logue DN, O'Shea T, Webb R. Evidence for the action of bovine follicular fluid factor(s) other than inhibin in suppressing follicular development and delaying oestrus in heifers. *J Reprod Fertil* 1992; 96:603–616.
66. Wood SC, Glencross RG, Bleach EC, Lovell R, Beard AJ, Knight PG. The ability of steroid-free bovine follicular fluid to suppress FSH secretion and delay ovulation persists in heifers actively immunized against inhibin. *J Endocrinol* 1993; 136:137–148.
